# Supplementary material
Source: Springer Nature journal article supplement (https://www.springermedizin.de/resource/supplementary/13633_2014_352_MOESM3_ESM.pdf/9596138)

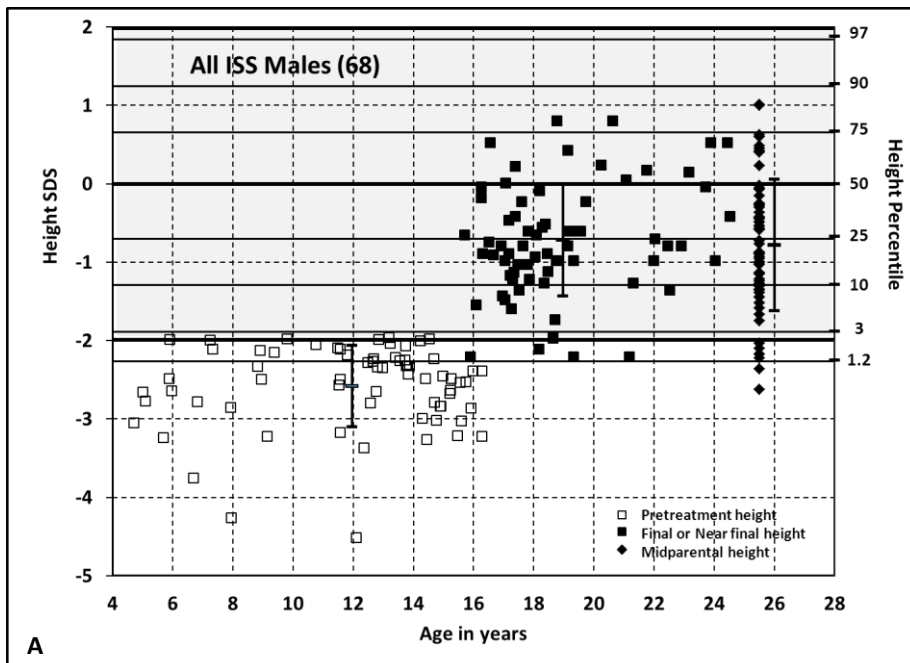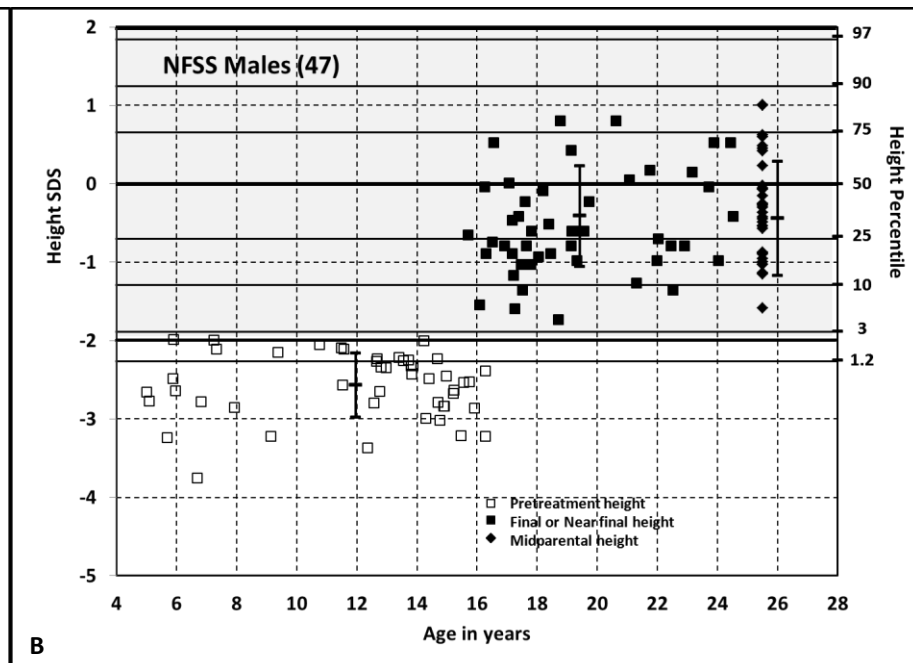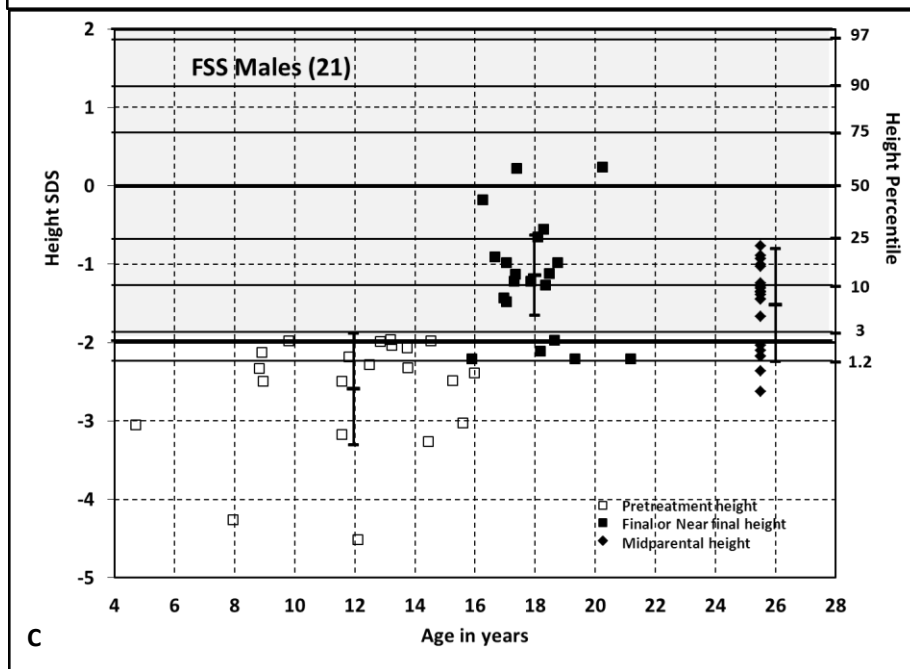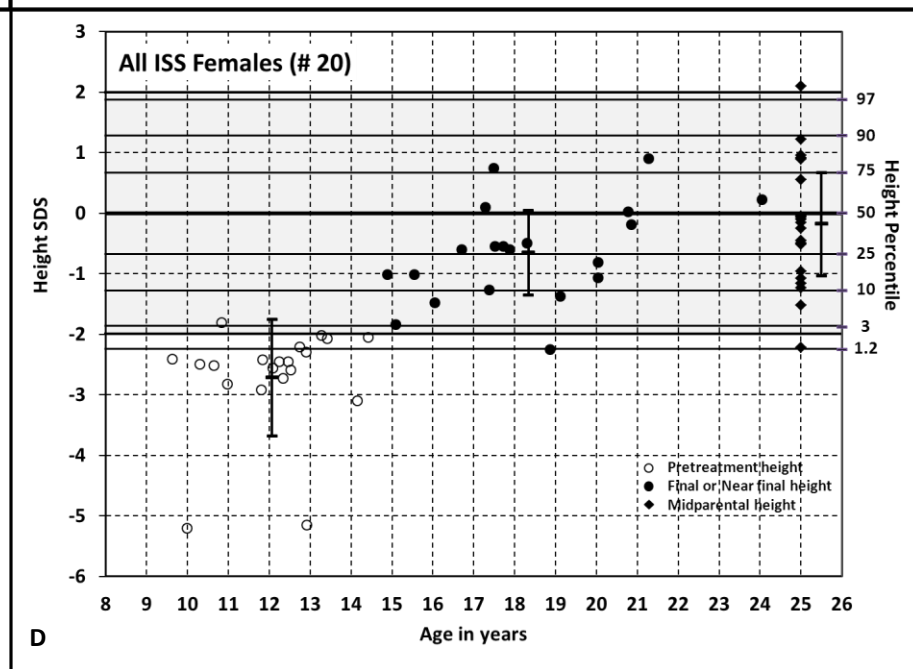

Supplement: MOESM3 [file 9596138]
